# Supplementary figures and images for: Catalyzed KSiH3as a reversible hydrogen storage material
Source: Royal Society of Chemistry journal article supplement (doi:10.1039/c6ta07563k), 2016-01-01

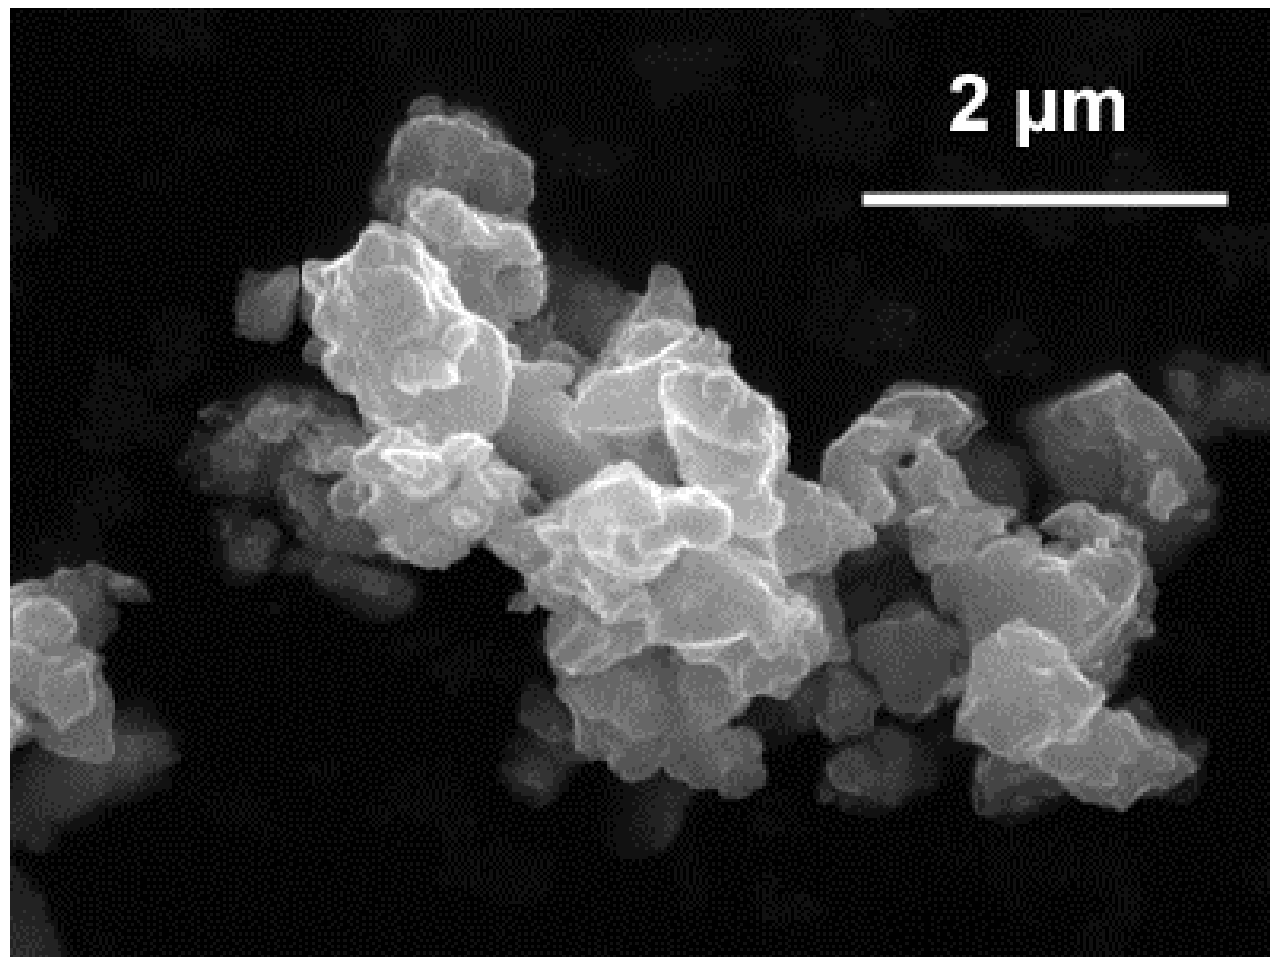

**Figure S1**

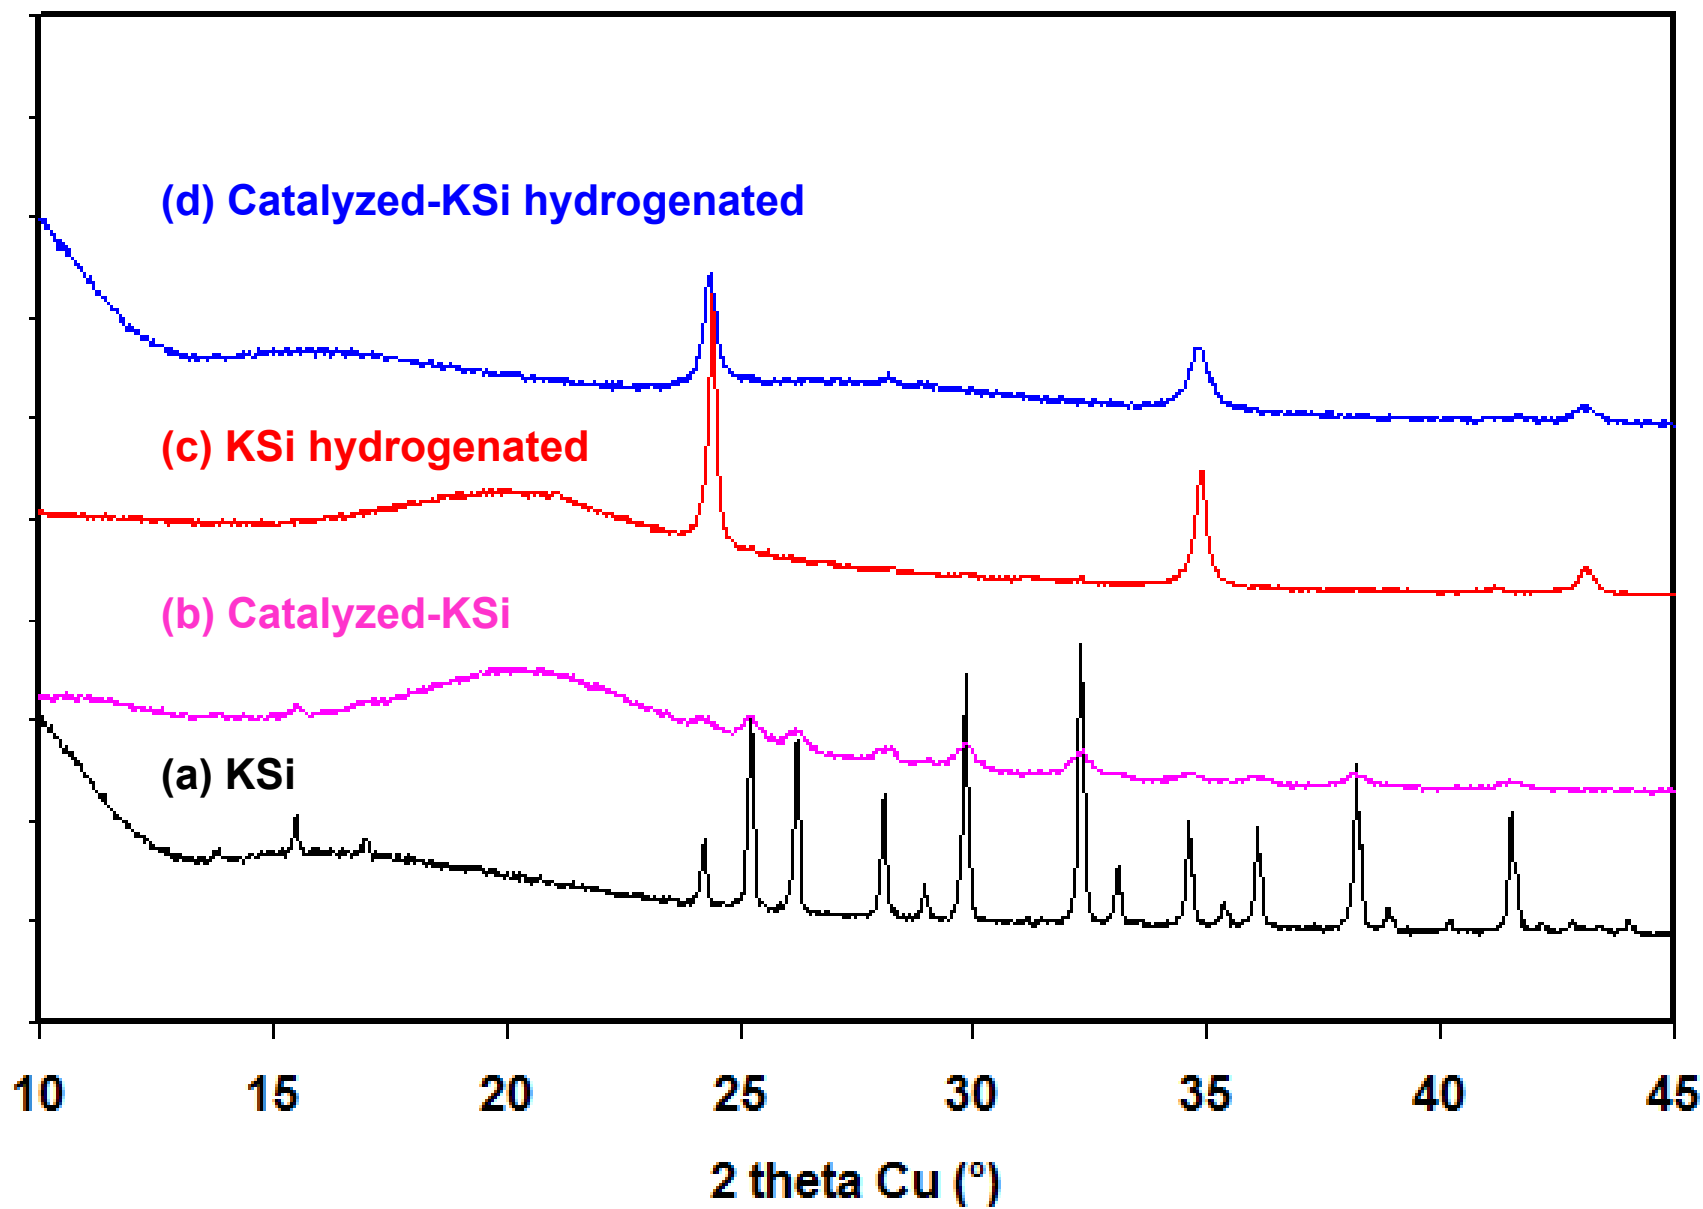

Figure S2

Supplement: c6ta07563k1.pdf [file c6ta07563k1.pdf]
